# Supplementary material for: Efficient Environmentally Friendly Flexible CZTSSe/ZnO Solar Cells by Optimizing ZnO Buffer Layers
Source: MDPI journal article supplement (doi:10.3390/ma16072869), 2023-04-04
Supplement: s1 [file s1]

## Supporting information

### Efficient Environmental Flexible CZTSSe/ZnO Solar Cells by Optimizing ZnO Buffer Layers

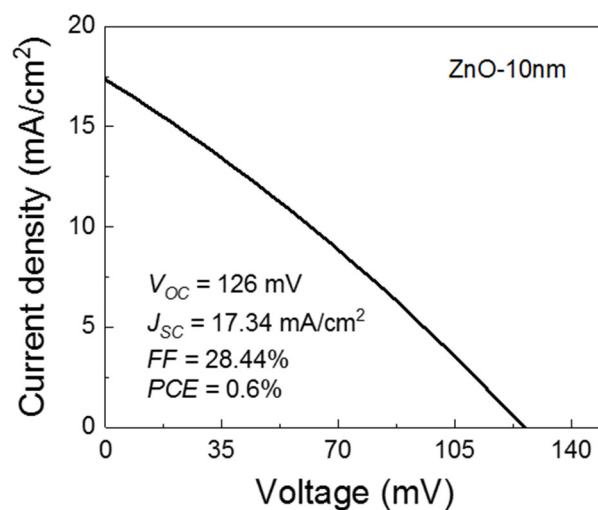

Figure S1. J-V curves of the flexible CZTSSe solar cells with 10 nm thick ZnO layers.

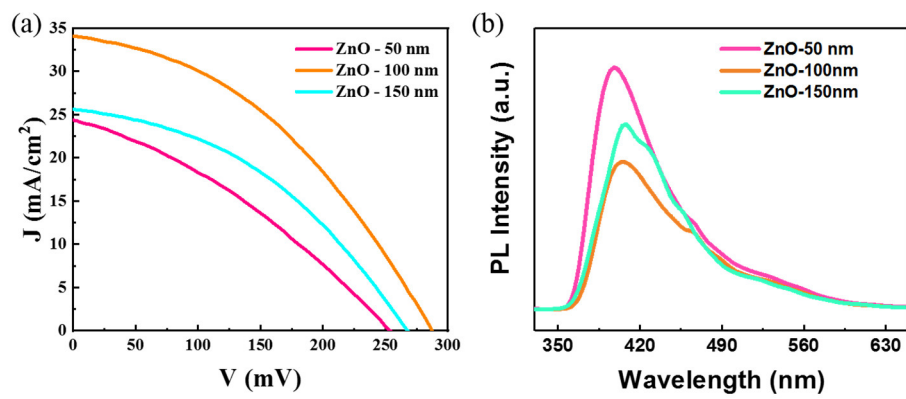

Figure S2. (a) J-V curves of the flexible CZTSSe solar cells with different thick ZnO layers. (b) PL spectra of ZnO layers with different thickness.

**Table S1.** GIXRD results of ZnO films annealed at different temperatures

| Temperature (°C) | 2-Theta (°) | Height | FWHM (°) |
|------------------|-------------|--------|----------|
| 150              | 34.26       | 5353   | 0.588    |
|                  | 62.70       | 1066   | 0.757    |
| 200              | 34.32       | 6440   | 0.575    |
|                  | 62.80       | 1688   | 0.745    |
| 250              | 34.34       | 5618   | 0.556    |
|                  | 62.82       | 1475   | 0.710    |
